# Supplementary material for: Laccase-Mediated Oxidation of Phenolic Compounds from Wine Lees Extract towards the Synthesis of Polymers with Potential Applications in Food Packaging
Source: MDPI journal article supplement (doi:10.3390/biom14030323), 2024-03-08
Supplement: s1 [file s1]

# Laccase-mediated oxidation of phenolic compounds from wine lees extract towards the synthesis of polymers with potential applications in food packaging

Panagiotis E. Athanasiou <sup>1</sup>, Christina I. Gkountela <sup>2</sup>, Michaela Patila <sup>1</sup>, Renia Fotiadou <sup>1</sup>, Alexandra V. Chatzikonstantinou<sup>1</sup>, Stamatina N. Vouyiouka <sup>2</sup> and Haralambos Stamatis <sup>1,\*</sup>

<sup>1</sup> Laboratory of Biotechnology, Department of Biological Applications and Technology, University of Ioannina, 45110 Ioannina, Greece

<sup>2</sup> Laboratory of Polymer Technology, School of Chemical Engineering, National Technical University of Athens, Zographou Campus, 15772 Athens, Greece

\* Correspondence: [hstamati@uoi.gr](mailto:hstamati@uoi.gr) (H.S.)

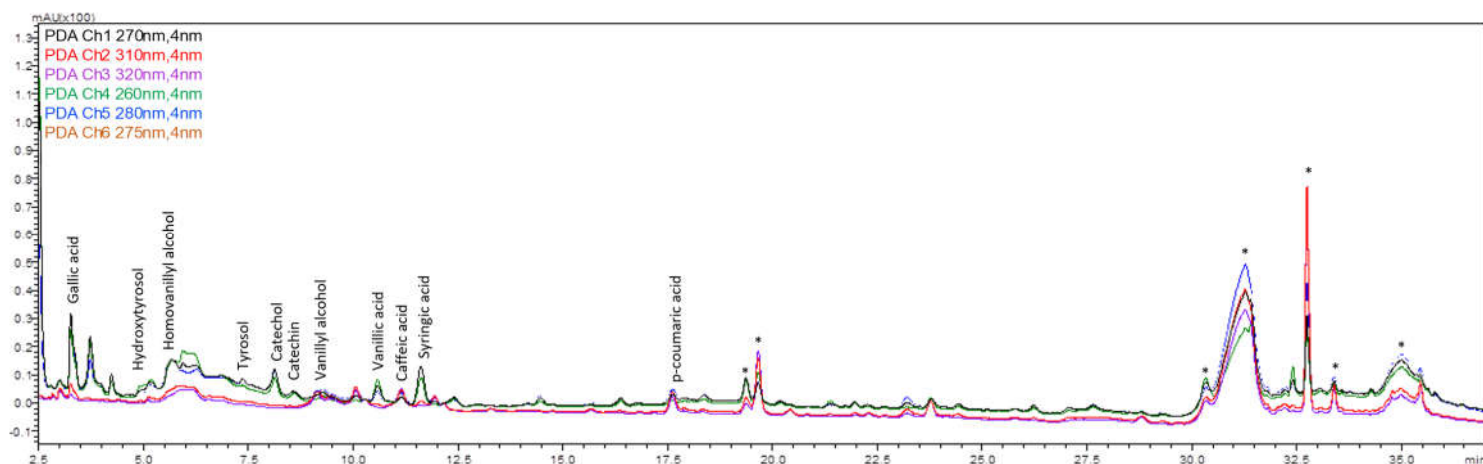

**Figure S1.** HPLC chromatogram of the reaction's supernatant before the polymerization process. Individual peaks of known phenolic compounds are marked by their respective names. Asterisk indicates individual unknown compounds with characteristic aromatic-like spectra.

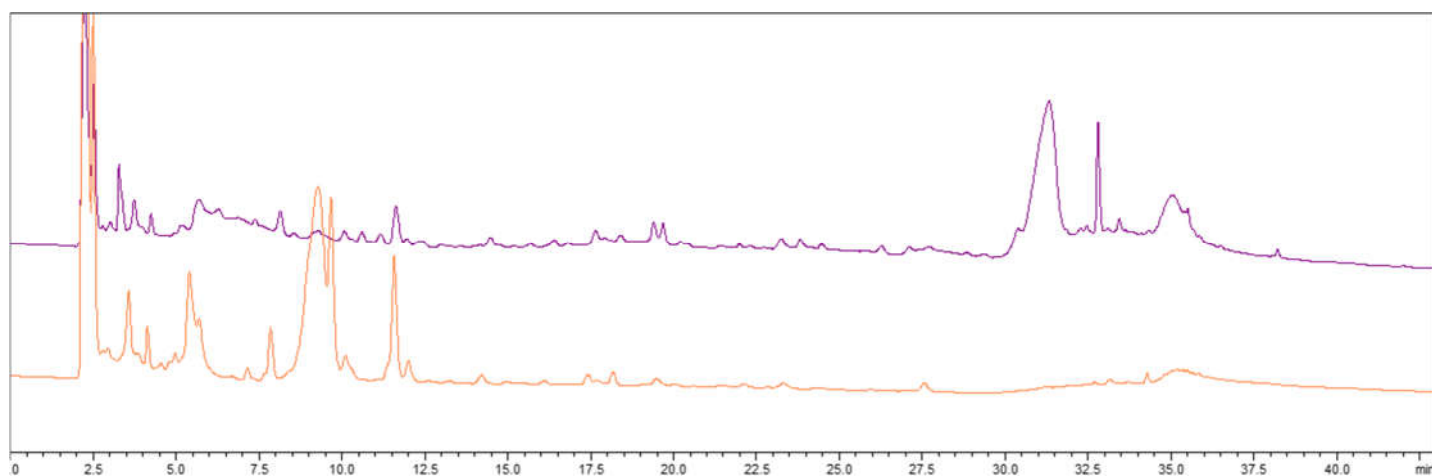

**Figure S2.** HPLC chromatograms at 280 nm of the WLE before and after TvL treatment.

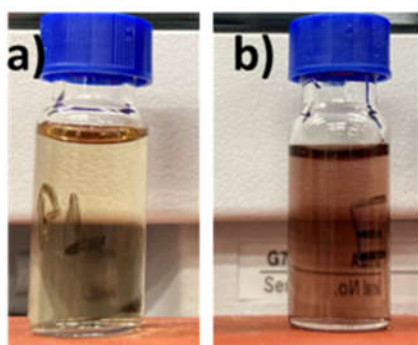

**Figure S3.** (a) The polymeric product P1h and (b) the extract dissolved in DMF.

**Table S1.** Thermal properties defined via TGA of the extract and the P1h and P24 h synthesized polymers.

| Sample  | $T_{d,5\%}$ (°C) | $T_{d1}$ (°C) | $T_{d2}$ (°C) | Residue (%) |
|---------|------------------|---------------|---------------|-------------|
| Extract | 164              | 194           | -             | 35          |
| P1h     | 186              | 238           | 308           | 29          |
| P24h    | 192.5            | 218           | 271           | 34          |

**Table S2.** Thermal properties defined via DSC of the extract and the P1h and P24 h synthesized polymers.

| Sample  | Endotherm 1 (°C) | $\Delta H_1$ (J·g <sup>-1</sup> ) | Endotherm 2 (°C) | $\Delta H_2$ (J·g <sup>-1</sup> ) | Endotherm 3 (°C) | $\Delta H_3$ (J·g <sup>-1</sup> ) | Endotherm 4 (°C) | $\Delta H_4$ (J·g <sup>-1</sup> ) |
|---------|------------------|-----------------------------------|------------------|-----------------------------------|------------------|-----------------------------------|------------------|-----------------------------------|
| Extract | 31               | 1                                 | 137              | 26                                | 201              | 27                                | 283              | 32                                |
| P1h     | 38               | 6                                 | 122              | 9                                 | 272              | 9                                 | 356              | 5                                 |
| P24h    | 40               | 5                                 | 123              | 10                                | 271              | 23                                | 344              | 3                                 |

**Table S3.** Antioxidant activity (%) of the formed polymeric products (tested concentration: 100 µg mL<sup>-1</sup>)

| Sample | Antioxidant activity (%) |            |
|--------|--------------------------|------------|
|        | ABTS                     | DPPH       |
| P1h    | 82.8 ± 1.9               | 93.1 ± 0.4 |
| P2h    | 74.7 ± 2.8               | 87.4 ± 1.0 |
| P6h    | 73.8 ± 2.5               | 84.8 ± 0.5 |
| P24h   | 70.6 ± 1.5               | 84.9 ± 0.2 |
